# Supplementary material for: Gut Microbiota Taxon-Dependent Transformation of Microglial M1/M2 Phenotypes Underlying Mechanisms of Spatial Learning and Memory Impairment after Chronic Methamphetamine Exposure
Source: PubMed Central journal article supplement (PMC10269813; doi:10.1128/spectrum.00302-23), 2023-05-22
Supplement: spectrum.00302-23-s0001.pdf [file spectrum.00302-23-s0001.pdf]

## A KEGG pathway annotation

**Cellular Processes**  
 Cellular community – eukaryotes  
 Cell motility  
 Cell growth and death

**Environmental Information Processing**  
 Signaling molecules and interaction  
 Signal transduction  
 Membrane transport

**Genetic Information Processing**  
 Translation  
 Folding, sorting and degradation

**Metabolism**  
 Xenobiotics biodegradation and metabolism  
 Nucleotide metabolism  
 Metabolism of terpenoids and polyketides  
 Metabolism of other amino acids  
 Metabolism of cofactors and vitamins  
 Lipid metabolism  
 Global and overview maps  
 Carbohydrate metabolism  
 Amino acid metabolism

**Organismal Systems**  
 Sensory system  
 Nervous system  
 Immune system  
 Excretory system  
 Environmental adaptation  
 Endocrine system  
 Digestive system  
 Circulatory system  
 Aging

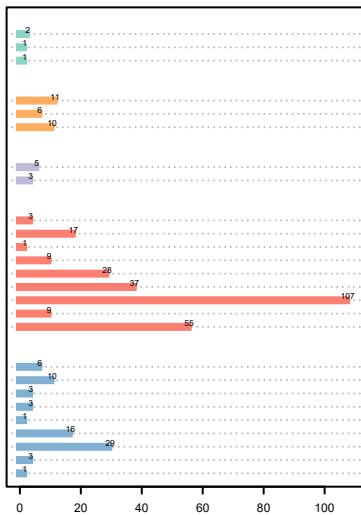

Number of Metabolites  
 Lipidmaps annotation

## B KEGG pathway annotation

**Cellular Processes**  
 Cellular community – eukaryotes  
 Cell growth and death

**Environmental Information Processing**  
 Signaling molecules and interaction  
 Signal transduction  
 Membrane transport

**Genetic Information Processing**  
 Translation

**Metabolism**  
 Xenobiotics biodegradation and metabolism  
 Nucleotide metabolism  
 Metabolism of terpenoids and polyketides  
 Metabolism of other amino acids  
 Metabolism of cofactors and vitamins  
 Lipid metabolism  
 Global and overview maps  
 Energy metabolism  
 Carbohydrate metabolism  
 Biosynthesis of other secondary metabolites  
 Amino acid metabolism

**Organismal Systems**  
 Sensory system  
 Nervous system  
 Immune system  
 Excretory system  
 Environmental adaptation  
 Endocrine system  
 Digestive system  
 Circulatory system

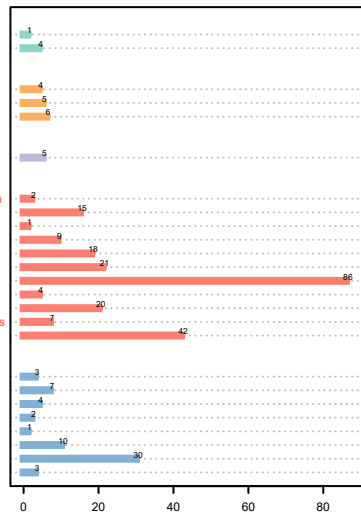

Number of Metabolites  
 Lipidmaps annotation

## C

**Fatty Acyls [FA]**  
 Octadecanoids [FA02]  
 Fatty esters [FA07]  
 Fatty amides [FA08]  
 Fatty alcohols [FA05]  
 Fatty Acids and Conjugates [FA01]  
 Eicosanoids [FA03]

**Glycerolipids [GL]**  
 Monoradylglycerols [GL01]

**Glycerophospholipids [GP]**  
 Glycerophosphoethanolamines [GP02]  
 Glycerophosphocholines [GP01]

**Polyketides [PR]**  
 Linear tetracyclines [PK07]  
 Flavonoids [PK12]  
 Aromatic polyketides [PK13]

**Prenol Lipids [PR]**  
 Quinones and hydroquinones [PR02]  
 Isoprenoids [PR01]

**Sphingolipids [SP]**  
 Sphingoid bases [SP01]  
 Ceramides [SP02]

**Sterols [ST]**  
 Sterols [ST01]  
 Steroids [ST02]  
 Steroid conjugates [ST05]  
 Secosteroids [ST03]  
 Bile acids and derivatives [ST04]

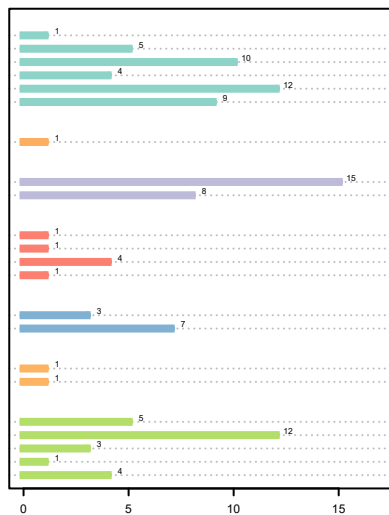

Number of Metabolites

## D

**Fatty Acyls [FA]**  
 Octadecanoids [FA02]  
 Fatty amides [FA08]  
 Fatty Acids and Conjugates [FA01]  
 Eicosanoids [FA03]  
 Docosanoids [FA04]

**Glycerophospholipids [GP]**  
 Glycerophosphoserines [GP03]  
 Glycerophosphoinositols [GP06]  
 Glycerophosphoglycerols [GP04]  
 Glycerophosphoethanolamines [GP02]  
 Glycerophosphocholines [GP01]  
 Glycerophosphates [GP10]

**Polyketides [PR]**  
 Flavonoids [PK12]  
 Aromatic polyketides [PK13]

**Sterols [ST]**  
 Sterols [ST01]  
 Steroids [ST02]  
 Steroid conjugates [ST05]  
 Bile acids and derivatives [ST04]

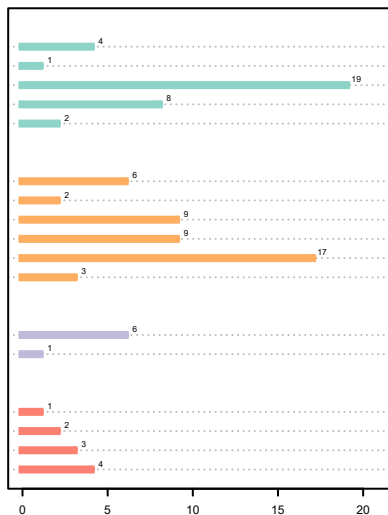

Number of Metabolites

**Fig S1** Functional enrichment analysis of differentially expressed metabolites. (A) KEGG pathway enrichment analysis of differential metabolites in ES+. (B) KEGG pathway enrichment analysis of differential metabolites in ES-. (C) Lipidmaps annotation of differential metabolites in ES+. (D) Lipidmaps annotation of differential metabolites in ES-. n = 6 for each group.
