# Supplementary material for: Gut Microbiota Taxon-Dependent Transformation of Microglial M1/M2 Phenotypes Underlying Mechanisms of Spatial Learning and Memory Impairment after Chronic Methamphetamine Exposure
Source: PubMed Central journal article supplement (PMC10269813; doi:10.1128/spectrum.00302-23), 2023-05-22
Supplement: spectrum.00302-23-s0002.pdf [file spectrum.00302-23-s0002.pdf]

## Supplemental Tables

**Table S1.** Mediation analysis of microglial M1/M2 phenotype, pro-inflammatory/anti-inflammatory cytokines and the proteins of the BDNF signaling system on the association of Clostridia with spatial learning and memory ability

| Mediator                                                                                        | Outcome | Total effect             | ACME                    | Mediation proportion |
|-------------------------------------------------------------------------------------------------|---------|--------------------------|-------------------------|----------------------|
| <b>M1 microglia and pro-inflammatory cytokines</b>                                              |         |                          |                         |                      |
| M1                                                                                              | EL      | 91.2% (52.6%, 122.0%)    | 47.5% (-4.1%, 117.0%)   | 47.2%                |
| IL-1 $\beta$                                                                                    | EL      | 86.8% (50.2%, 117.0%)    | 88.1% (-8.1%, 156.0%)   | 112.4%               |
| IL-6                                                                                            | EL      | 86.7% (47.0%, 123.0%)    | 43.9% (9.4%, 106.0%)    | 47.9%                |
| M1                                                                                              | NPC     | -87.2% (-118.8%, -61.0%) | -23.3% (-73.8%, 33.0%)  | 22.6%                |
| IL-1 $\beta$                                                                                    | NPC     | -94.2% (-132.7%, -63.0%) | -52.4% (-132.2%, 19.0%) | 51.8%                |
| IL-6                                                                                            | NPC     | -88.9% (-127.6%, -46.0%) | -13.5% (-62.5%, 21.0%)  | 12.8%                |
| M1                                                                                              | TSTQ    | -90.9% (-133.2%, -59.0%) | -45.6% (-101.7%, 1.0%)  | 48.5%                |
| IL-1 $\beta$                                                                                    | TSTQ    | -89.8% (-121.9%, -63.0%) | -79.1% (-140.6%, -9.0%) | 85.9%                |
| IL-6                                                                                            | TSTQ    | -89.4% (-125.9%, -55.0%) | -24.7% (-64.9%, 16.0%)  | 30.2%                |
| <b>M2 microglia, anti-inflammatory cytokines, and the proteins of the BDNF signaling system</b> |         |                          |                         |                      |
| M2                                                                                              | EL      | 86.8% (49.2%, 121.0%)    | 42.9% (-0.4%, 86.0%)    | 49.2%                |
| IL-4                                                                                            | EL      | 91.0% (44.3%, 119.0%)    | 12.5% (-25.0%, 69.0%)   | 11.0%                |
| IL-10                                                                                           | EL      | 87.9% (49.7%, 116.0%)    | -11.6% (-68.3%, 38.0%)  | -6.8%                |
| TGF- $\beta$                                                                                    | EL      | 88.8% (60.3%, 124.0%)    | 38.2% (-2.1%, 83.0%)    | 44.6%                |
| mBDNF                                                                                           | EL      | 87.0% (57.8%, 118.0%)    | 16.4% (-43.1%, 66.0%)   | 19.8%                |
| TrkB                                                                                            | EL      | 91.0% (59.7%, 135.0%)    | 37.0% (3.3%, 90.0%)     | 41.7%                |
| proBDNF                                                                                         | EL      | 88.1% (57.2%, 117.0%)    | 45.6% (17.0%, 86.0%)    | 54.7%                |
| p75 <sup>NTR</sup>                                                                              | EL      | 90.2% (55.3%, 121.0%)    | 17.6% (-27.7%, 74.0%)   | 15.9%                |
| t-PA                                                                                            | EL      | 86.4% (57.0%, 114.0%)    | 60.2% (13.1%, 127.0%)   | 70.3%                |
| M2                                                                                              | NPC     | -84.2% (-119.3%, -60.0%) | -42.3% (-75.2%, -9.0%)  | 47.3%                |
| IL-4                                                                                            | NPC     | -91.3% (-121.2%, -55.0%) | -3.6% (-38.5%, 34.0%)   | 1.9%                 |
| IL-10                                                                                           | NPC     | -88.8% (-125.0%, -62.0%) | 15.7% (-23.3%, 56.0%)   | -20.6%               |

|                    |      |                          |                          |       |
|--------------------|------|--------------------------|--------------------------|-------|
| TGF- $\beta$       | NPC  | -88.0% (-114.8%, -57.0%) | -42.5% (-108.8%, 1.0%)   | 45.2% |
| mBDNF              | NPC  | -87.4% (-110.8%, -53.0%) | -8.2% (-69.6%, 42.0%)    | 12.8% |
| TrkB               | NPC  | -89.8% (-114.5%, -60.0%) | -14.4% (-55.0%, 42.0%)   | 17.8% |
| proBDNF            | NPC  | -87.4% (-136.2%, -50.0%) | -51.1% (-95.5%, -19.0%)  | 54.9% |
| p75 <sup>NTR</sup> | NPC  | -91.2% (-121.8%, -60.0%) | -21.3% (-79.7%, 21.0%)   | 18.5% |
| t-PA               | NPC  | -88.2% (-118.1%, -58.0%) | -12.8% (-87.1%, 60.0%)   | 20.4% |
| M2                 | TSTQ | -94.5% (-125.1%, -60.0%) | -62.1% (-99.9%, -26.0%)  | 62.7% |
| IL-4               | TSTQ | -88.7% (-119.7%, -52.0%) | -13.8% (-56.8%, 24.0%)   | 13.4% |
| IL-10              | TSTQ | -92.7% (-132.7%, -62.0%) | 1.9% (-45.2%, 68.0%)     | 1.3%  |
| TGF- $\beta$       | TSTQ | -95.9% (-133.9%, -65.0%) | -45.0% (-97.4%, 7.0%)    | 47.9% |
| mBDNF              | TSTQ | -88.2% (-128.1%, -54.0%) | -16.2% (-87.2%, 30.0%)   | 14.9% |
| TrkB               | TSTQ | -89.5% (-126.0%, -60.0%) | -33.1% (-78.1%, 15.0%)   | 39.3% |
| proBDNF            | TSTQ | -92.6% (-134.1%, -55.0%) | -47.0% (-101.8%, -13.0%) | 50.9% |
| p75 <sup>NTR</sup> | TSTQ | -87.8% (-128.0%, -50.0%) | -16.3% (-67.5%, 29.0%)   | 15.5% |
| t-PA               | TSTQ | -87.8% (-116.3%, -57.0%) | -38.6% (-98.4%, 43.0%)   | 50.8% |

Note: Data are shown as percent changes and 95% confidence intervals. EL: escape latency; NPC: number of platform crossings; TSTQ: time spent in the target quadrant (% of total time). EL is the indicator of spatial learning ability. NPC and TSTQ are indicators of spatial memory ability.

**Table S2.** Mediation analysis of microglial M1/M2 phenotype, pro-inflammatory/anti-inflammatory cytokines and the proteins of the BDNF signaling system on the association of *muribaculaceae* with spatial learning and memory ability

| Mediator                                                                                        | Outcome | Total effect             | ACME                     | Mediation proportion |
|-------------------------------------------------------------------------------------------------|---------|--------------------------|--------------------------|----------------------|
| <b>M1 microglia and pro-inflammatory cytokines</b>                                              |         |                          |                          |                      |
| M1                                                                                              | EL      | -78.6% (-123.2%, -32.0%) | -42.6% (-82.1%, -11.0%)  | 53.4%                |
| IL-1 $\beta$                                                                                    | EL      | -83.5% (-132.7%, -47.0%) | -57.5% (-109.7%, -22.0%) | 69.0%                |
| IL-6                                                                                            | EL      | -85.7% (-136.1%, -49.0%) | -59.4% (-117.4%, -21.0%) | 69.2%                |
| TNF- $\alpha$                                                                                   | EL      | -79.3% (-136.9%, -41.0%) | -36.5% (-95.3%, -1.0%)   | 44.7%                |
| M1                                                                                              | NPC     | 77.5% (20.4%, 126.0%)    | 42.3% (2.5%, 78.0%)      | 55.7%                |
| IL-1 $\beta$                                                                                    | NPC     | 73.1% (31.8%, 143.0%)    | 62.5% (16.4%, 147.0%)    | 87.3%                |
| IL-6                                                                                            | NPC     | 76.3% (38.6%, 112.0%)    | 50.1% (-18.6%, 117.0%)   | 62.5%                |
| TNF- $\alpha$                                                                                   | NPC     | 71.2% (19.9%, 125.0%)    | 50.0% (10.3%, 129.0%)    | 69.0%                |
| M1                                                                                              | TSTQ    | 73.1% (25.1%, 113.0%)    | 39.9% (5.7%, 92.0%)      | 54.6%                |
| IL-1 $\beta$                                                                                    | TSTQ    | 71.6% (24.0%, 113.0%)    | 59.6% (8.8%, 115.0%)     | 82.7%                |
| IL-6                                                                                            | TSTQ    | 76.1% (38.9%, 121.0%)    | 41.9% (0.3%, 100.0%)     | 60.2%                |
| TNF- $\alpha$                                                                                   | TSTQ    | 72.4% (19.0%, 114.0%)    | 33.4% (-3.2%, 84.0%)     | 43.2%                |
| <b>M2 microglia, anti-inflammatory cytokines, and the proteins of the BDNF signaling system</b> |         |                          |                          |                      |
| M2                                                                                              | EL      | -82.6% (-116.6%, -42.0%) | -43.2% (-84.4%, -11.0%)  | 50.4%                |
| IL-4                                                                                            | EL      | -81.5% (-121.0%, -39.0%) | -28.1% (-70.5%, 2.0%)    | 33.6%                |
| TGF- $\beta$                                                                                    | EL      | -79.8% (-122.9%, -43.0%) | -48.9% (-99.0%, -13.0%)  | 61.2%                |
| mBDNF                                                                                           | EL      | -81.0% (-115.9%, -33.0%) | -32.1% (-72.1%, 1.0%)    | 38.4%                |
| TrkB                                                                                            | EL      | -83.7% (-130.2%, -42.0%) | -73.9% (-136.9%, -21.0%) | 84.4%                |
| proBDNF                                                                                         | EL      | -81.2% (-123.5%, -36.0%) | -79.6% (-165.1%, -28.0%) | 99.0%                |
| p75 <sup>NTR</sup>                                                                              | EL      | -84.8% (-123.7%, -47.0%) | -22.3% (-61.5%, 19.0%)   | 23.7%                |
| t-PA                                                                                            | EL      | -81.5% (-124.7%, -40.0%) | -43.8% (-81.8%, -9.0%)   | 53.0%                |
| M2                                                                                              | NPC     | 66.7% (25.8%, 101.0%)    | 44.9% (13.4%, 96.0%)     | 62.8%                |
| IL-4                                                                                            | NPC     | 75.4% (21.5%, 128.0%)    | 22.1% (-27.7%, 85.0%)    | 29.5%                |

|                    |      |                       |                        |        |
|--------------------|------|-----------------------|------------------------|--------|
| TGF- $\beta$       | NPC  | 71.4% (30.9%, 114.0%) | 52.8% (10.3%, 119.0%)  | 69.9%  |
| mBDNF              | NPC  | 81.1% (26.6%, 141.0%) | 35.7% (0.2%, 91.0%)    | 46.1%  |
| TrkB               | NPC  | 73.9% (29.0%, 128.0%) | 53.7% (-39.9%, 159.0%) | 64.3%  |
| proBDNF            | NPC  | 72.1% (21.6%, 125.0%) | 101.8% (57.9%, 192.0%) | 144.4% |
| p75 <sup>NTR</sup> | NPC  | 77.0% (26.8%, 134.0%) | 23.5% (-25.0%, 86.0%)  | 32.9%  |
| t-PA               | NPC  | 74.6% (31.5%, 124.0%) | 42.9% (4.8%, 97.0%)    | 51.7%  |
| M2                 | TSTQ | 79.1% (41.3%, 121.0%) | 53.4% (12.2%, 99.0%)   | 62.6%  |
| IL-4               | TSTQ | 71.4% (14.6%, 125.0%) | 26.3% (-15.9%, 76.0%)  | 40.2%  |
| TGF- $\beta$       | TSTQ | 81.1% (47.5%, 136.0%) | 60.4% (16.0%, 116.0%)  | 75.5%  |
| mBDNF              | TSTQ | 71.9% (32.8%, 135.0%) | 27.9% (2.8%, 77.0%)    | 38.7%  |
| TrkB               | TSTQ | 75.3% (36.6%, 117.0%) | 66.5% (-8.9%, 150.0%)  | 97.7%  |
| proBDNF            | TSTQ | 83.4% (36.1%, 125.0%) | 93.5% (32.1%, 152.0%)  | 107.4% |
| p75 <sup>NTR</sup> | TSTQ | 81.6% (32.6%, 122.0%) | 26.2% (-11.0%, 60.0%)  | 32.2%  |
| t-PA               | TSTQ | 71.9% (24.5%, 112.0%) | 37.8% (3.8%, 71.0%)    | 48.3%  |

Note: Data are shown as percent changes and 95% confidence intervals. EL: escape latency; NPC: number of platform crossings; TSTQ: time spent in the target quadrant (% of total time). EL is the indicator of spatial learning ability. NPC and TSTQ are indicators of spatial memory ability.

**Table S3.** Mediation analysis of microglial M1/M2 phenotype, pro-inflammatory/anti-inflammatory cytokines and the proteins of the BDNF signaling system on the association of *bacteroides* with spatial learning and memory ability

| Mediator                                                                                        | Outcome | Total effect             | ACME                     | Mediation proportion |
|-------------------------------------------------------------------------------------------------|---------|--------------------------|--------------------------|----------------------|
| <b>M1 microglia and pro-inflammatory cytokines</b>                                              |         |                          |                          |                      |
| M1                                                                                              | EL      | 93.0% (63.9%, 128.0%)    | 74.4% (-40.4%, 186.0%)   | 82.3%                |
| IL-1 $\beta$                                                                                    | EL      | 88.9% (61.5%, 132.0%)    | 50.8% (19.9%, 103.0%)    | 54.8%                |
| IL-6                                                                                            | EL      | 93.8% (56.7%, 127.0%)    | 49.5% (7.6%, 96.0%)      | 50.4%                |
| M1                                                                                              | NPC     | -86.9% (-133.5%, -49.0%) | -62.4% (-185.5%, 99.0%)  | 73.4%                |
| IL-1 $\beta$                                                                                    | NPC     | -89.5% (-126.1%, -62.0%) | -60.8% (-125.5%, -18.0%) | 65.8%                |
| IL-6                                                                                            | NPC     | -84.8% (-119.6%, -38.0%) | -27.1% (-90.1%, 45.0%)   | 31.0%                |
| M1                                                                                              | TSTQ    | -88.1% (-130.0%, -50.0%) | -55.2% (-172.9%, 50.0%)  | 80.2%                |
| IL-1 $\beta$                                                                                    | TSTQ    | -85.8% (-115.4%, -45.0%) | -51.3% (-84.8%, -22.0%)  | 58.9%                |
| IL-6                                                                                            | TSTQ    | -84.3% (-126.8%, -48.0%) | -24.7% (-74.2%, 48.0%)   | 26.3%                |
| <b>M2 microglia, anti-inflammatory cytokines, and the proteins of the BDNF signaling system</b> |         |                          |                          |                      |
| M2                                                                                              | EL      | 92.0% (66.4%, 127.0%)    | 46.8% (1.0%, 98.0%)      | 51.7%                |
| IL-4                                                                                            | EL      | 87.4% (45.3%, 127.0%)    | 14.7% (-17.2%, 46.0%)    | 17.2%                |
| TGF- $\beta$                                                                                    | EL      | 92.0% (52.5%, 120.0%)    | 41.0% (7.3%, 103.0%)     | 39.1%                |
| mBDNF                                                                                           | EL      | 96.2% (53.8%, 131.0%)    | 10.5% (-53.6%, 71.0%)    | 16.9%                |
| TrkB                                                                                            | EL      | 89.3% (60.7%, 128.0%)    | 34.4% (8.5%, 75.0%)      | 34.1%                |
| proBDNF                                                                                         | EL      | 92.7% (58.4%, 120.0%)    | 46.1% (18.9%, 85.0%)     | 49.4%                |
| p75 <sup>NTR</sup>                                                                              | EL      | 88.5% (58.5%, 134.0%)    | 22.2% (-10.0%, 78.0%)    | 24.5%                |
| t-PA                                                                                            | EL      | 90.6% (53.0%, 125.0%)    | 66.8% (-12.4%, 147.0%)   | 80.9%                |
| M2                                                                                              | NPC     | -87.8% (-124.9%, -53.0%) | -73.4% (-155.8%, -3.0%)  | 86.8%                |
| IL-4                                                                                            | NPC     | -82.0% (-115.6%, -35.0%) | -17.0% (-69.6%, 33.0%)   | 21.4%                |
| TGF- $\beta$                                                                                    | NPC     | -83.8% (-116.7%, -42.0%) | -52.2% (-97.5%, -13.0%)  | 62.7%                |
| mBDNF                                                                                           | NPC     | -86.9% (-125.4%, -49.0%) | -17.7% (-107.9%, 71.0%)  | 17.3%                |
| TrkB                                                                                            | NPC     | -82.8% (-122.6%, -50.0%) | -28.1% (-90.0%, 35.0%)   | 32.0%                |

|                    |      |                          |                          |       |
|--------------------|------|--------------------------|--------------------------|-------|
| proBDNF            | NPC  | -88.2% (-118.5%, -46.0%) | -50.6% (-85.5%, -18.0%)  | 58.8% |
| p75 <sup>NTR</sup> | NPC  | -84.9% (-114.1%, -47.0%) | -36.9% (-105.5%, -2.0%)  | 40.9% |
| t-PA               | NPC  | -81.9% (-123.0%, -47.0%) | -32.0% (-148.4%, 71.0%)  | 26.6% |
| M2                 | TSTQ | -90.3% (-144.2%, -58.0%) | -74.9% (-142.0%, -34.0%) | 82.1% |
| IL-4               | TSTQ | -90.7% (-122.8%, -56.0%) | -19.6% (-76.5%, 16.0%)   | 18.4% |
| TGF- $\beta$       | TSTQ | -92.7% (-126.1%, -58.0%) | -43.9% (-86.4%, -14.0%)  | 43.5% |
| mBDNF              | TSTQ | -91.0% (-130.8%, -59.0%) | -9.5% (-66.5%, 59.0%)    | 9.9%  |
| TrkB               | TSTQ | -86.8% (-123.3%, -49.0%) | -35.9% (-82.3%, -6.0%)   | 43.2% |
| proBDNF            | TSTQ | -86.7% (-125.7%, -47.0%) | -44.2% (-75.5%, -12.0%)  | 49.9% |
| p75 <sup>NTR</sup> | TSTQ | -87.2% (-122.2%, -59.0%) | -19.8% (-61.5%, 9.0%)    | 22.3% |
| t-PA               | TSTQ | -89.4% (-122.5%, -52.0%) | -39.9% (-130.9%, 63.0%)  | 51.6% |

Note: Data are shown as percent changes and 95% confidence intervals. EL: escape latency; NPC: number of platform crossings; TSTQ: time spent in the target quadrant (% of total time). EL is the indicator of spatial learning ability. NPC and TSTQ are indicators of spatial memory ability.

**Table S4.** Mediation analysis of microglial M1/M2 phenotype, pro-inflammatory/anti-inflammatory cytokines and the proteins of the BDNF signaling system on the association of *lactobacillus* with spatial learning and memory ability

| Mediator                                                                                        | Outcome | Total effect             | ACME                     | Mediation proportion |
|-------------------------------------------------------------------------------------------------|---------|--------------------------|--------------------------|----------------------|
| <b>M1 microglia and pro-inflammatory cytokines</b>                                              |         |                          |                          |                      |
| M1                                                                                              | EL      | 88.9% (51.8%, 115.0%)    | 62.9% (3.4%, 147.0%)     | 69.2%                |
| IL-1 $\beta$                                                                                    | EL      | 91.5% (66.1%, 125.0%)    | 67.2% (14.8%, 112.0%)    | 71.4%                |
| IL-6                                                                                            | EL      | 90.2% (54.5%, 128.0%)    | 49.4% (-30.7%, 146.0%)   | 53.6%                |
| M1                                                                                              | NPC     | -79.7% (-126.1%, -34.0%) | -90.2% (-215.5%, 17.0%)  | 116.7%               |
| IL-1 $\beta$                                                                                    | NPC     | -80.9% (-122.4%, -45.0%) | -86.8% (-173.7%, -26.0%) | 107.6%               |
| IL-6                                                                                            | NPC     | -78.3% (-116.8%, -22.0%) | -35.6% (-146.7%, 108.0%) | 59.9%                |
| M1                                                                                              | TSTQ    | -87.9% (-137.5%, -47.0%) | -77.8% (-160.4%, 11.0%)  | 90.2%                |
| IL-1 $\beta$                                                                                    | TSTQ    | -86.2% (-124.8%, -49.0%) | -83.6% (-152.4%, -22.0%) | 98.8%                |
| IL-6                                                                                            | TSTQ    | -83.0% (-118.9%, -37.0%) | -5.4% (-96.3%, 86.0%)    | 10.8%                |
| <b>M2 microglia, anti-inflammatory cytokines, and the proteins of the BDNF signaling system</b> |         |                          |                          |                      |
| M2                                                                                              | EL      | 88.6% (53.6%, 120.0%)    | 43.9% (9.7%, 81.0%)      | 48.4%                |
| IL-4                                                                                            | EL      | 92.1% (65.6%, 128.0%)    | 16.4% (-28.2%, 65.0%)    | 14.6%                |
| TGF- $\beta$                                                                                    | EL      | 94.1% (58.3%, 134.0%)    | 44.7% (2.5%, 96.0%)      | 49.2%                |
| mBDNF                                                                                           | EL      | 85.4% (58.8%, 107.0%)    | 23.1% (-20.6%, 78.0%)    | 29.4%                |
| TrkB                                                                                            | EL      | 88.8% (51.1%, 129.0%)    | 36.8% (-9.0%, 98.0%)     | 38.9%                |
| proBDNF                                                                                         | EL      | 88.4% (49.0%, 120.0%)    | 49.9% (20.8%, 87.0%)     | 55.9%                |
| p75 <sup>NTR</sup>                                                                              | EL      | 93.5% (60.9%, 126.0%)    | 25.5% (-31.2%, 73.0%)    | 28.4%                |
| t-PA                                                                                            | EL      | 93.1% (57.3%, 129.0%)    | 60.6% (-5.9%, 144.0%)    | 66.0%                |
| M2                                                                                              | NPC     | -77.9% (-115.3%, -30.0%) | -58.6% (-94.9%, -8.0%)   | 75.7%                |
| IL-4                                                                                            | NPC     | -77.8% (-119.5%, -31.0%) | -25.2% (-88.0%, 16.0%)   | 26.4%                |
| TGF- $\beta$                                                                                    | NPC     | -78.8% (-125.3%, -36.0%) | -69.1% (-153.4%, -14.0%) | 90.8%                |
| mBDNF                                                                                           | NPC     | -75.4% (-126.2%, -30.0%) | -38.3% (-131.0%, 17.0%)  | 44.6%                |
| TrkB                                                                                            | NPC     | -79.9% (-127.4%, -22.0%) | -35.5% (-112.5%, 25.0%)  | 37.3%                |

|                    |      |                          |                          |       |
|--------------------|------|--------------------------|--------------------------|-------|
| proBDNF            | NPC  | -75.9% (-118.1%, -34.0%) | -59.6% (-115.0%, -15.0%) | 80.2% |
| p75 <sup>NTR</sup> | NPC  | -83.4% (-122.2%, -43.0%) | -40.9% (-96.3%, 21.0%)   | 51.5% |
| t-PA               | NPC  | -73.1% (-120.2%, -22.0%) | -49.1% (-150.0%, 27.0%)  | 54.7% |
| M2                 | TSTQ | -89.8% (-131.5%, -39.0%) | -70.2% (-124.5%, -23.0%) | 78.9% |
| IL-4               | TSTQ | -87.1% (-130.7%, -42.0%) | -17.4% (-68.7%, 42.0%)   | 21.1% |
| TGF- $\beta$       | TSTQ | -88.8% (-130.5%, -54.0%) | -55.4% (-103.1%, 1.0%)   | 62.6% |
| mBDNF              | TSTQ | -83.3% (-130.2%, -35.0%) | -27.4% (-101.9%, 36.0%)  | 27.1% |
| TrkB               | TSTQ | -88.0% (-140.0%, -43.0%) | -48.6% (-111.5%, -3.0%)  | 58.9% |
| proBDNF            | TSTQ | -82.7% (-121.5%, -46.0%) | -52.4% (-89.8%, -18.0%)  | 65.5% |
| p75 <sup>NTR</sup> | TSTQ | -81.6% (-126.6%, -43.0%) | -32.0% (-91.5%, 18.0%)   | 37.7% |
| t-PA               | TSTQ | -88.3% (-134.1%, -52.0%) | -58.4% (-158.9%, 15.0%)  | 58.7% |

Note: Data are shown as percent changes and 95% confidence intervals. EL: escape latency; NPC: number of platform crossings; TSTQ: time spent in the target quadrant (% of total time). EL is the indicator of spatial learning ability. NPC and TSTQ are indicators of spatial memory ability.
